# Supplementary material for: Nucleostemin upregulation and STAT3 activation as early events in oral epithelial dysplasia progression to squamous cell carcinoma
Source: PubMed Central journal article supplement — Neoplasia. 2021 Nov 13;23(12):1289–99. doi: 10.1016/j.neo.2021.11.001 (PMC8605099; doi:10.1016/j.neo.2021.11.001), 2021-11-13
Supplement: mmc1.pdf [file mmc1.pdf]

## SUPPLEMENTARY DATA

**Table S1.** Development of squamous cell lesions on the dorsal tongues of Sprague-Dawley rats treated with 4NQO (50 ppm) in drinking water.

| Duration | Hyper-keratosis | Hyper-plasia | Low-grade Dysplasia | High-grade Dysplasia | CIS | OSCC | Total |
|----------|-----------------|--------------|---------------------|----------------------|-----|------|-------|
| 12 wks   | 0               | 1            | 4                   | 1                    | 0   | 2    | 8     |
| 16 wks   | 3               | 1            | 2                   | 0                    | 0   | 2    | 8     |
| 20 wks   | 0               | 1            | 4                   | 1                    | 1   | 1    | 8     |
| 24 wks   | 0               | 0            | 4                   | 4                    | 0   | 0    | 8     |

p.s. Low-grade dysplasia = mild and moderate dysplasia

p.s. CIS: carcinoma *in situ*

## FIGURE LEGENDS

**Figure S1.** Primer sequences for Short Tagged Sequence (STS) marker analysis  
Primer ID's, chromosomal locations (Chr.), and sequence information for detecting 17  
STS implicated in the differential susceptibilities of Dark-Agouti and Wistar/Furth rats to  
4NQO-induced tongue cancers. Tsccl, five quantitative trait loci for tongue squamous  
cell carcinoma identified by Tanuma et al<sup>1</sup>.

## REFERENCES

- 1 Tanuma J, Hiai H, Shisa H, Hirano M, Semba I, Nagaoka S *et al.* Carcinogenesis modifier loci in rat tongue are subject to frequent loss of heterozygosity. *Int J Cancer* 2002; 102: 638-642.

Figure S1

|         | Primer   | Chr.                         | Forward                         | Reverse                         |
|---------|----------|------------------------------|---------------------------------|---------------------------------|
| Tsc2    | D1Rat213 | RNO1                         | 5'-CAGCAACCAGGAACATGAAG-3'      | 5'-TCCAGTGCTAGGAGCCAAGT-3'      |
|         | D1Rat27  | RNO1                         | 5'-GGGCAAGCAAAGTACATGGT-3'      | 5'-TCTCTCCAGCTGCAGGATTT-3'      |
|         | D1Rat319 | RNO1                         | 5'-CATGGTGTGGTGCTATGGT-3'       | 5'-TCCCACACTCTTCTGCACTG-3'      |
|         | D1Rat320 | RNO1                         | 5'-CTCCACATGCACAGGCATAT-3'      | 5'-CTCCTAAAGTCCCATTGCA-3'       |
|         | D1Rat382 | RNO1                         | 5'-GGCCGAATGCTTTCAATAGA-3'      | 5'-GGCATACATGCTCAAACCTGC-3'     |
| Tsc3    | D1Mgh21  | RNO1                         | 5'-CATCCCCTCATGAATGG-3'         | 5'-AGGGAGGGAGAACAACACTCATATG-3' |
|         | D1Wox22  | RNO1                         | 5'-TACCCACACGTACATGCACA-3'      | 5'-CAATGTGGTTCCAATCGAAG-3'      |
|         | D1Mit5   | RNO1                         | 5'-AAAGTGGGGTACTCTCTATGGG-3'    | 5'-TAGGGTGATACAAGGCAGGG-3'      |
|         | D1Wox36  | RNO1                         | 5'-AAGGTGGGACCAGGACATC-3'       | 5'-TGGGACTGACTGGCAAATC-3'       |
| Tsc4    | D1Mgh10  | RNO1                         | 5'-TGAGGATTGCCTCTGACCC-3'       | 5'-AACACCTCAAGCATGTGTGC-3'      |
|         | D4Mgh18  | RNO4                         | 5'-AACACCTCAAGCATGTGTGC-3'      | 5'-AACATTCTCACCAGCTCATAAGC-3'   |
|         | D4Mgh10  | RNO4                         | 5'-CAGTGTACACAGTGGTGTACAGAC-3'  | 5'-ATTGTGATGCTGGGGATTGA-3'      |
|         | D5Mgh4   | RNO5                         | 5'-GGGACATCTCCACATTTTCA-3'      | 5'-GGCAAAAATGTCATAGAGGACC-3'    |
|         | D5Mgh10  | RNO5                         | 5'-GCTTCCACATACACGTGTGG-3'      | 5'-TGCTACTGAGTTGTGTCTGTTTTG-3'  |
|         | D5Mit11  | RNO5                         | 5'-CAGCTATGCCCTTCCATCAT-3'      | 5'-ACAATAGGAAGGGCTACAATGTG-3'   |
| D6Rat55 | RNO6     | 5'-GGGACTCATGCAAATTGTCC-3'   | 5'-GCAGGGTGCTGTTAGGAGTG-3'      |                                 |
| D6Rat45 | RNO6     | 5'-TGTGCGTTTGTATATTTCTCC-3'  | 5'-ACCATTGAAAATAAGATAGAAAGCA-3' |                                 |
| NS      | RNO16    | 5'-AAGAATGACAATGCTGGAGGGC-3' | 5'-CCATCCTGTTGGTCTTCTGTCT-3'    |                                 |
| POLR2   | RNO10    | 5'-AAGCAACGGTTGAAGGGCAAGG-3' | 5'-AAGGTCATGTTGGCAGCAATGG-3'    |                                 |
